# Supplementary material for: FeVO4 nanowires for efficient photocatalytic CO2 reduction
Source: Royal Society of Chemistry journal article supplement (doi:10.1039/d2cy00324d), 2022-01-01
Supplement: d2cy00324d1.pdf [file d2cy00324d1.pdf]

## Support Information

### FeVO<sub>4</sub> nanowires for efficient photocatalytic CO<sub>2</sub> reduction

Yang Li,<sup>a</sup> Zhaojian Zeng,<sup>a</sup> Yong Chen,<sup>a</sup> Yuanming Zhang,<sup>a</sup> Wenjing Wang,<sup>a</sup> Xiaoming Xu,<sup>a</sup> Mengyang Du,<sup>a</sup> Zhaosheng Li,<sup>a, b, \*</sup> Zhigang Zou<sup>a, b</sup>

<sup>a</sup>Collaborative Innovation Center of Advanced Microstructures, National Laboratory of Solid State Microstructures, College of Engineering and Applied Sciences, Nanjing University, 22 Hankou Road, Nanjing 210093, China

<sup>b</sup>Jiangsu Key Laboratory for Nano Technology, Nanjing University, 22 Hankou Road, Nanjing 210093, China

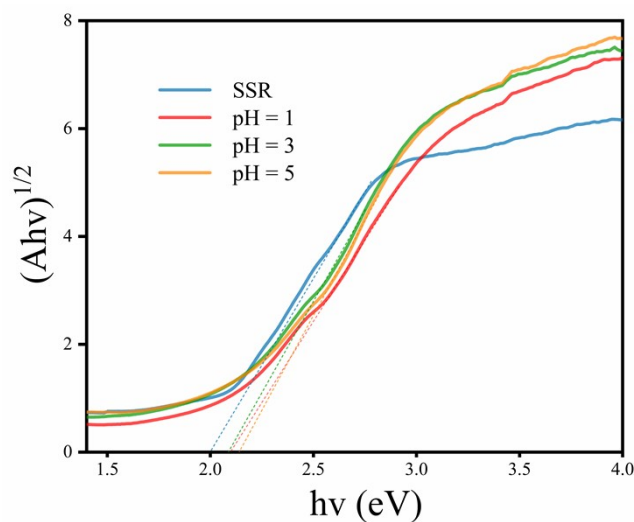

Figure S1. Tauc plot of FeVO<sub>4</sub>

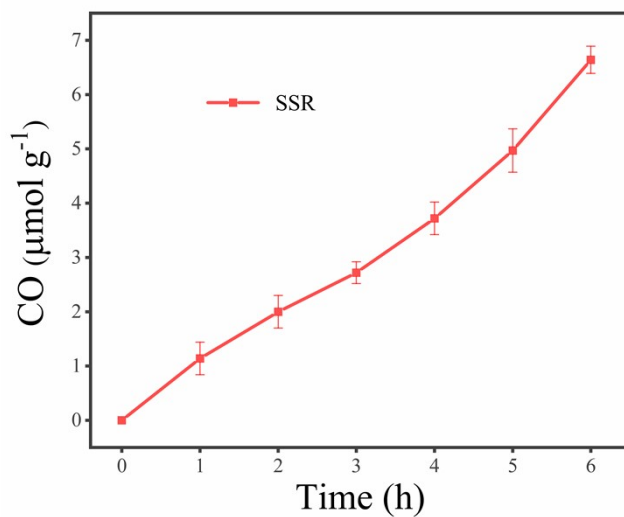

**Figure S2.** Photocatalytic CO production over FeVO<sub>4</sub> samples prepared by solid-state reaction as a function of light irradiation times.

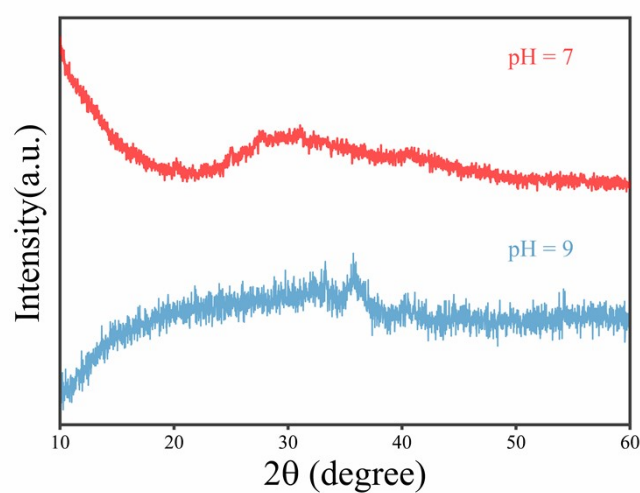

**Figure S3.** XRD patterns of FeVO<sub>4</sub> sample prepared by hydrothermal synthesis with pH = 7 and pH = 9.

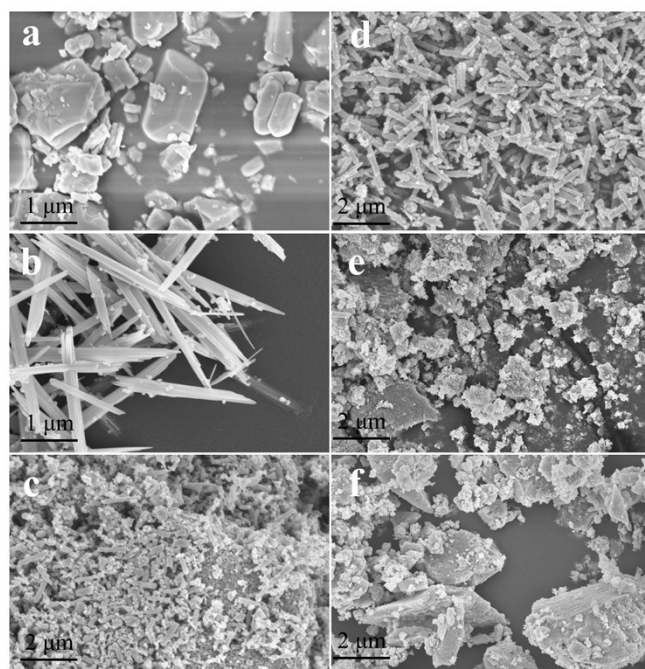

**Figure S4.** SEM images of  $\text{FeVO}_4$  samples synthesized by solid state reaction (a) and hydrothermal synthesis with pH = 1(b), 3(c), 5(d), 7(e), 9(f).

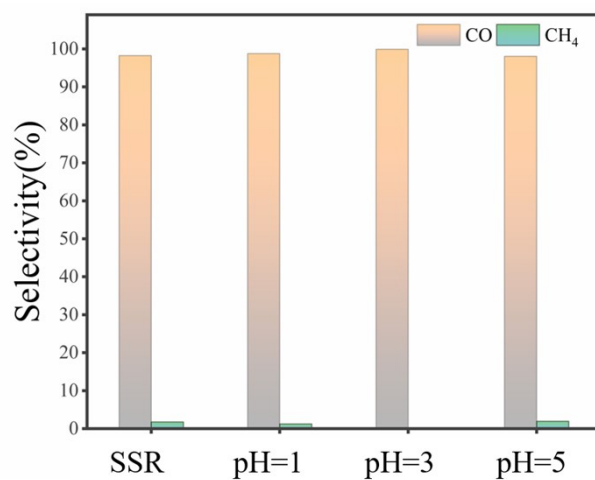

**Figure S5.** Product selectivity of photocatalytic CO<sub>2</sub> reduction over various FeVO<sub>4</sub> samples.

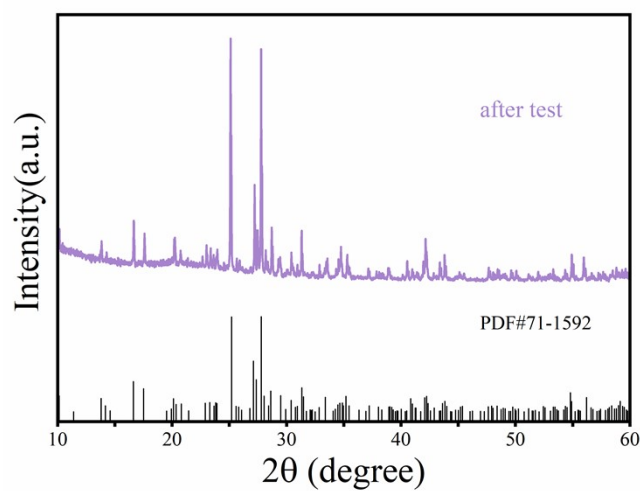

**Figure S6.** XRD patterns of FeVO<sub>4</sub> nanowires after the test.

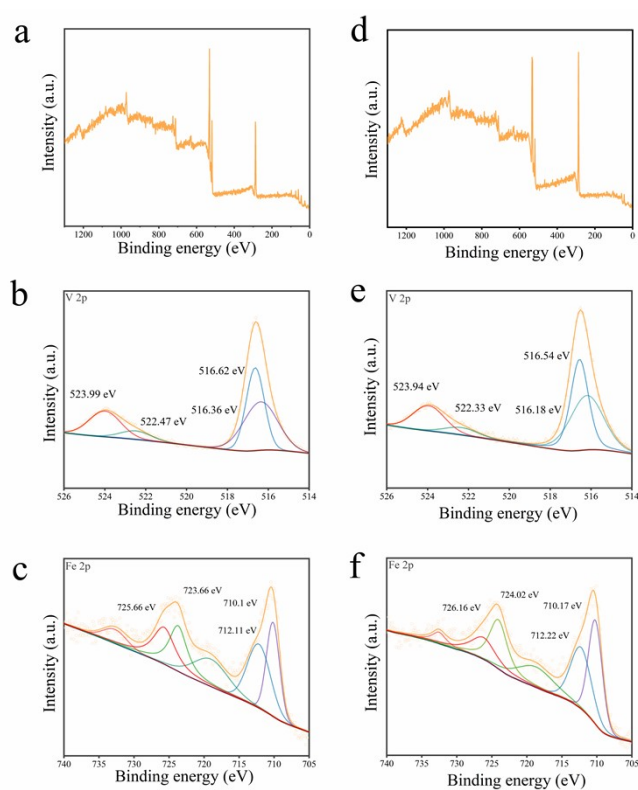

**Figure S7.** (a) XPS spectra of FeVO<sub>4</sub> particles. (b) V 2p XPS spectra of FeVO<sub>4</sub> particles. (c) Fe 2p XPS spectra of FeVO<sub>4</sub> particles. (d) XPS spectra of FeVO<sub>4</sub> nanowires. (e) V 2p XPS spectra of FeVO<sub>4</sub> nanowires. (f) Fe 2p XPS spectra of FeVO<sub>4</sub> nanowires.

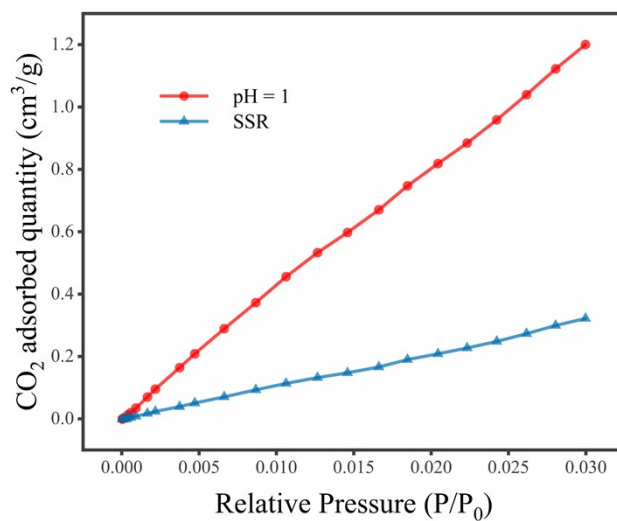

**Figure S8.** CO<sub>2</sub> adsorption isotherms of FeVO<sub>4</sub> nanowires (pH=1) and FeVO<sub>4</sub> particles (SSR).

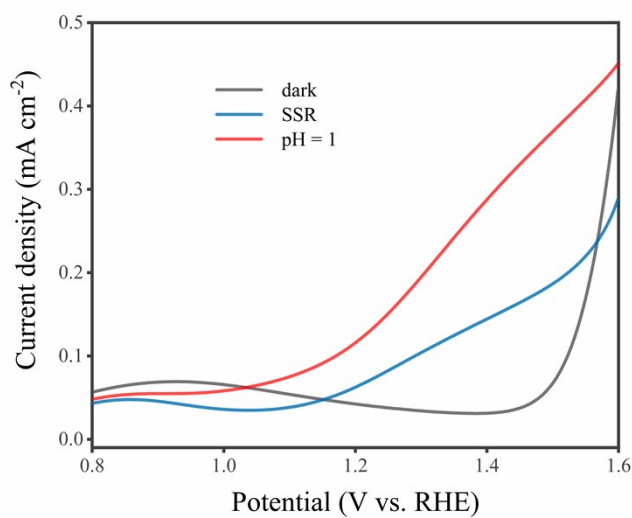

**Figure S9** Current-potential curves of the FeVO<sub>4</sub> particle-assembled films measured in 1 M NaOH aqueous solution under xenon illumination (100 mW cm<sup>-2</sup>)

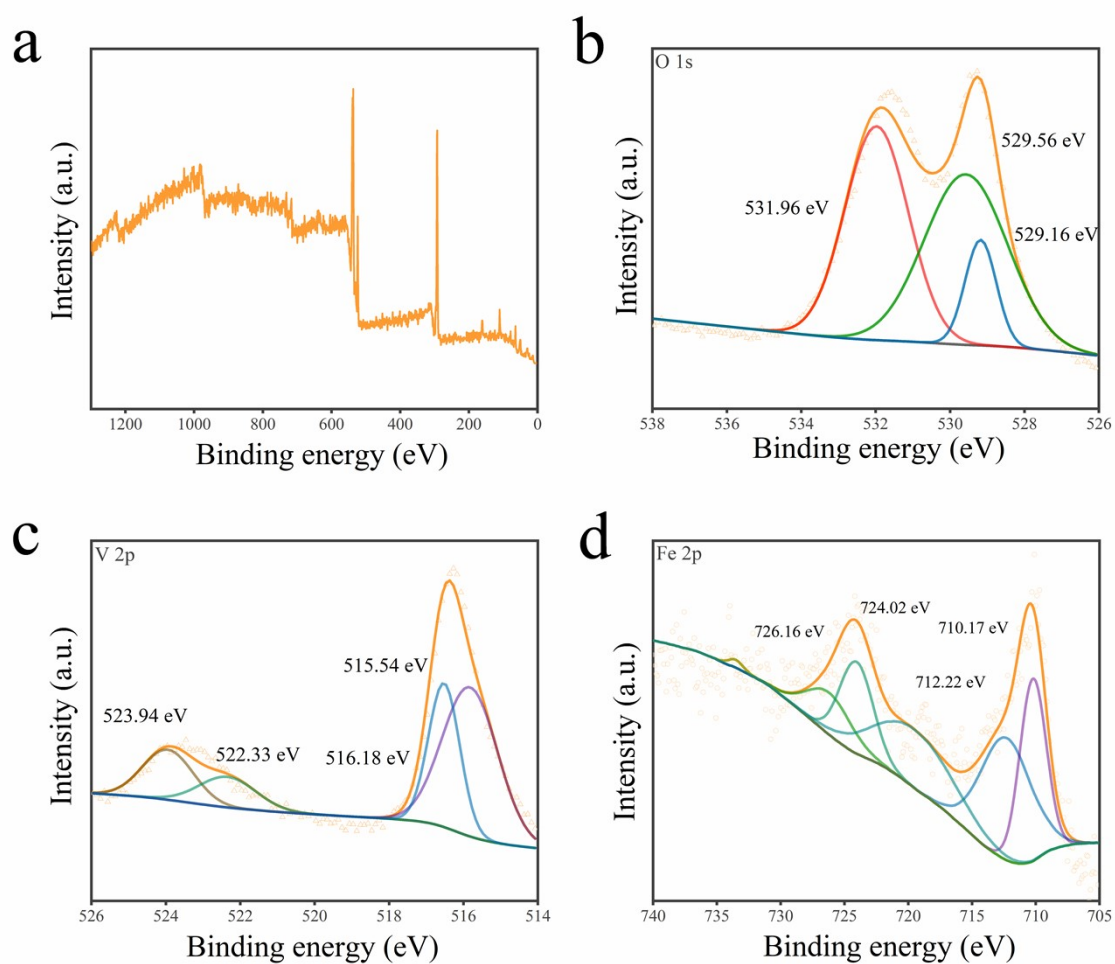

**Figure S10** (a) XPS spectra of FeVO<sub>4</sub> nanowires after the test. (b) O 1s, (c) V 2p, and (d) Fe 2p XPS spectra of FeVO<sub>4</sub> nanowires after the test.

Table S1 Fluorescence emission decay parameters of the FeVO<sub>4</sub> particles and nanowires (pH = 1).

| $R(t) = B_1e^{(-1/\tau_1)} + B_2e^{(-1/\tau_2)}$ |               |                    |               |                    |                  |
|--------------------------------------------------|---------------|--------------------|---------------|--------------------|------------------|
| Sample                                           | $\tau_1$ (ns) | B <sub>1</sub> (%) | $\tau_2$ (ns) | B <sub>2</sub> (%) | Ave. $\tau$ (ns) |
| SSR                                              | 1.22          | 97.35              | 8.31          | 2.65               | 1.41             |
| pH = 1                                           | 1.51          | 0.27               | 32.81         | 99.73              | 32.78            |
